# Supplementary material for: False head complexity and evidence of predator attacks in male and female hairstreak butterflies (Lepidoptera: Theclinae: Eumaeini) from Mexico
Source: PeerJ. 2019 Jun 25;7:e7143. doi: 10.7717/peerj.7143 (PMC6598652; doi:10.7717/peerj.7143)
Supplement: Appendix S1 — Species name, number of false head components and number of specimens with and without symmetrical damage in the false head area. [file peerj-07-7143-s001.xlsx]

## Sheet: Hoja1
Collection	Genus	Species	Number of false head components	# of specimens revised	# of males	# of females	# of individuals with symmetrical damage	# of males with symmetrical damage	# of females with symmetrical damage
CNIN	Allosmaitia	strophius	2	41	27	14	0	0	0
CNIN	Arawacus	jada	3	18	5	13	0	0	0
CNIN	Arawacus	sito	4	115	80	35	5	3	2
CNIN	Arawacus	togarna	4	45	38	7	0	0	0
CNIN	Arcas	cypria	2	37	12	25	0	0	0
CNIN	Arzecla	arza	2	20	9	11	0	0	0
CNIN	Atlides	carpasia	2	35	17	18	0	0	0
CNIN	Atlides	gaumeri	2	21	12	9	1	0	1
CNIN	Atlides	halesus	2	11	5	6	1	0	1
CNIN	Atlides	inachus	2	30	14	16	0	0	0
CNIN	Atlides	polybe	3	52	24	28	0	0	0
CNIN	Brangas	carthaea	2	18	15	3	0	0	0
CNIN	Brangas	getus	2	12	9	3	0	0	0
CNIN	Brangas	neora	2	49	36	13	0	0	0
CNIN	Brevianta	busa	2	16	11	5	0	0	0
CNIN	Callophrys	xami	2	24	12	12	0	0	0
CNIN	Calycopis	clarina	2	18	12	6	0	0	0
CNIN	Calycopis	demonassa	2	43	30	13	0	0	0
CNIN	Calycopis	isobeon	2	258	156	102	2	0	2
CNIN	Chalybs	hassan	2	27	12	15	0	0	0
CNIN	Chalybs	janias	2	34	19	15	1	1	0
CNIN	Chlorostrymon	simaethis	2	54	24	30	0	0	0
CNIN	Chlorostrymon	telea	2	71	49	22	2	2	0
CNIN	Contrafacia	ahola	2	14	1	13	0	0	0
CNIN	Cyanophrys	herodotus	2	156	91	65	1	1	0
CNIN	Cyanophrys	miserabilis	2	59	29	30	0	0	0
CNIN	Electrostrymon	canus	2	28	28	0	0	0	0
CNIN	Electrostrymon	mathewi	2	24	14	10	0	0	0
CNIN	Electrostrymon	sangala	2	44	44	0	0	0	0
CNIN	Evenus	batesii	3	34	22	12	0	0	0
CNIN	Evenus	regalis	3	62	38	24	0	0	0
CNIN	Janthecla	janthodonia	3	20	17	3	1	1	0
CNIN	Kolana	lyde	3	39	28	11	0	0	0
CNIN	Lamprospilus	collucia	2	54	48	6	0	0	0
CNIN	Laothus	barajo	4	42	25	17	1	0	1
CNIN	Laothus	erybathis	4	39	16	23	2	2	0
CNIN	Magnastigma	elsa	2	19	11	8	0	0	0
CNIN	Micandra	cyda	3	11	8	3	0	0	0
CNIN	Michaelus	hecate	2	40	27	13	0	0	0
CNIN	Michaelus	jebus	2	34	24	10	0	0	0
CNIN	Michaelus	vibidia	2	19	8	11	0	0	0
CNIN	Ministrymon	arola	3	68	51	17	0	0	0
CNIN	Ministrymon	azia	2	57	29	28	0	0	0
CNIN	Ministrymon	clytie	3	24	8	16	0	0	0
CNIN	Ministrymon	leda	3	34	25	9	0	0	0
CNIN	Ministrymon	phrutus	1	31	16	15	0	0	0
CNIN	Nicolaea	velina	2	15	1	14	0	0	0
CNIN	Ocaria	ocrisia	2	63	49	14	0	0	0
CNIN	Ocaria	thales	2	16	9	7	0	0	0
CNIN	Oenomaus	ortygnus	3	62	21	41	0	0	0
CNIN	Panthiades	bathildis	4	86	38	48	2	1	1
CNIN	Panthiades	bitias	2	95	66	29	1	1	0
CNIN	Panthiades	ochus	3	41	33	8	2	2	0
CNIN	Panthiades	phaleros	4	15	9	6	0	0	0
CNIN	Parrhasius	orgia	2	20	12	8	2	1	1
CNIN	Parrhasius	polibetes	2	58	31	27	0	0	0
CNIN	Pseudolycaena	damo	3	72	34	38	1	1	0
CNIN	Rekoa	marius	2	101	48	53	0	0	0
CNIN	Rekoa	meton	3	61	38	23	0	0	0
CNIN	Rekoa	palegon	3	94	41	53	0	0	0
CNIN	Rekoa	zebina	2	14	5	9	1	1	0
CNIN	Siderus	gnosia	2	19	13	6	0	0	0
CNIN	Strymon	albata	2	38	23	15	0	0	0
CNIN	Strymon	istapa	2	53	32	21	0	0	0
CNIN	Strymon	melinus	2	76	74	2	0	0	0
CNIN	Strymon	ziba	3	44	15	29	0	0	0
CNIN	Strymon	yojoa	3	90	33	57	1	0	1
CNIN	Thecla	tephraeus	2	41	28	13	0	0	0
CNIN	Theclopsis	mycon	2	78	63	15	1	1	0
CNIN	Thereus	cithonius	2	15	12	3	0	0	0
CNIN	Thereus	oppia	2	65	40	25	0	0	0
CNIN	Thereus	ortalus	2	17	6	11	1	0	1
CNIN	Theritas	augustinula	3	27	11	16	2	1	1
CNIN	Theritas	lisus	2	59	24	35	0	0	0
CNIN	Theritas	mavors	2	39	28	11	0	0	0
CNIN	Theritas	theocritus	3	34	12	22	0	0	0
CNIN	Tmolus	crolinus	3	45	38	7	0	0	0
CNIN	Tmolus	echion	3	98	62	36	1	0	1
CNIN	Ziegleria	hesperitis	2	43	26	17	0	0	0
CNIN	Ziegleria	syllis	2	27	18	9	0	0	0
MZFC	Allosmaitia	strophius	2	60			0	0	0
MZFC	Arawacus	jada	3	545			15	15	0
MZFC	Arawacus	sito	4	408	298	110	5	4	1
MZFC	Arawacus	togarna	4	176	144	32	7	5	2
MZFC	Arcas	cypria	2	46	28	18	0	0	0
MZFC	Arzecla	sethon	2	37			1	0	1
MZFC	Atlides	carpasia	2	100	53	47	0	0	0
MZFC	Atlides	gaumeri	2	55	34	21	0	0	0
MZFC	Atlides	halesus	2	14	7	7	1	0	1
MZFC	Atlides	inachus	2	47	22	25	0	0	0
MZFC	Atlides	polybe	3	103	57	46	3	2	1
MZFC	Aubergina	paetus	3	47	19	28	0	0	0
MZFC	Brangas	carthaea	2	14	10	4	0	0	0
MZFC	Brangas	neora	2	114	72	42	0	0	0
MZFC	Brevianta	busa	2	42	34	8	0	0	0
MZFC	Bussa	tolmides	3	13			2	1	1
MZFC	Calycopis	calus	2	28			0	0	0
MZFC	Calycopis	clarina	2	154	89	65	1	0	1
MZFC	Calycopis	demonassa	2	91	51	40	0	0	0
MZFC	Calycopis	isobeon	2	1180			11	9	2
MZFC	Calycopis	susanna	2	40			0	0	0
MZFC	Calycopis	trebula	2	39			0	0	0
MZFC	Celmia	celmus	2	86	75	11	1	1	0
MZFC	Chalybs	hassan	2	144	87	57	3	2	1
MZFC	Chalybs	janias	2	53	27	26	2	2	0
MZFC	Chlorostrymon	simaethis	2	42			1	1	0
MZFC	Chlorostrymon	telea	2	56	42	14	0	0	0
MZFC	Contrafacia	ahola	2	56			0	0	0
MZFC	Contrafacia	bassania	3	65			4	2	2
MZFC	Cyanophrys	agricolor	2	43			1	0	1
MZFC	Cyanophrys	amyntor	2	14			0	0	0
MZFC	Cyanophrys	fusius	2	17			1	0	1
MZFC	Cyanophrys	goodsoni	1	58			0	0	0
MZFC	Cyanophrys	herodotus	2	825			3	1	2
MZFC	Cyanophrys	longula	2	304	94	210	7	3	4
MZFC	Cyanophrys	miserabilis	2	314			5	3	2
MZFC	Dicya	carnica	2	54	50	4	0	0	0
MZFC	Electrostrymon	canus	2	27	9	18	0	0	0
MZFC	Electrostrymon	joya	2	73	70	3	0	0	0
MZFC	Electrostrymon	mathewi	2	110			0	0	0
MZFC	Electrostrymon	sangala	2	106	84	22	1	1	0
MZFC	Electrostrymon	sp	2	149	0	149	2	0	2
MZFC	Enos	thara	3	10			0	0	0
MZFC	Erora	carla	1	18			0	0	0
MZFC	Erora	nitetis	2	30	16	14	0	0	0
MZFC	Erora	quaderna	1	64	47	17	1	1	0
MZFC	Erora	subflorens	1	25			0	0	0
MZFC	Evenus	regalis	3	153			1	0	1
MZFC	Gargina	thoria	2	13	5	8	0	0	0
MZFC	Gargina	caninius	2	14	4	10	0	0	0
MZFC	Hypostrymon	critola	3	13	9	4	1	0	1
MZFC	Iaspis	castimonia	2	15	12	3	1	1	0
MZFC	Ignata	gadira	2	45	39	6	1	1	0
MZFC	Ignata	sp	2	24	24	0	0	0	0
MZFC	Janthecla	janthodonia	3	17	14	3	0	0	0
MZFC	Kolana	ligurina	3	49	33	16	0	0	0
MZFC	Kolana	lyde	3	11	8	3	0	0	0
MZFC	Lamprospilus	collucia	2	41	36	5	0	0	0
MZFC	Laothus	barajo	4	130	45	85	4	3	1
MZFC	Laothus	erybathis	4	132			13	10	3
MZFC	Micandra	cyda	3	110			10	0	10
MZFC	Michaelus	hecate	2	103	52	51	1	1	0
MZFC	Michaelus	jebus	2	35	14	21	0	0	0
MZFC	Ministrymon	arola	3	46	13	33	0	0	0
MZFC	Ministrymon	azia	2	1138			2	2	0
MZFC	Ministrymon	clytie	3	818	481	337	1	1	0
MZFC	Ministrymon	leda	3	65			0	0	0
MZFC	Ministrymon	phrutus	1	218			3	1	2
MZFC	Ministrymon	zilda	2	12	9	3	0	0	0
MZFC	Ocaria	ocrisia	2	120	95	25	1	1	0
MZFC	Ocaria	thales	2	12			0	0	0
MZFC	Oenomaus	ortygnus	3	74	38	36	1	0	1
MZFC	Ostrinotes	keila	2	38	18	20	0	0	0
MZFC	Paiwarria	umbratus	3	31	25	6	0	0	0
MZFC	Panthiades	bathildis	4	418	276	142	10	4	6
MZFC	Panthiades	bitias	2	217	134	83	2	1	1
MZFC	Panthiades	ochus	3	35	22	13	2	0	2
MZFC	Parrhasius	moctezuma	2	173	91	82	8	7	1
MZFC	Parrhasius	orgia	2	63	50	13	0	0	0
MZFC	Parrhasius	polibetes	2	212	118	94	2	2	0
MZFC	Pseudolycaena	damo	3	550	249	301	18	8	10
MZFC	Rekoa	marius	2	349	198	151	1	1	0
MZFC	Rekoa	meton	3	385	223	162	15	8	7
MZFC	Rekoa	palegon	3	376	178	198	7	2	5
MZFC	Rekoa	stagira	2	11	3	8	0	0	0
MZFC	Rekoa	zebina	2	200	54	146	5	1	4
MZFC	Strephonota	tephraeus	2	261	192	69	1	1	0
MZFC	Strymon	albata	2	94			0	0	0
MZFC	Strymon	bazochii	1	201	156	45	1	1	0
MZFC	Strymon	bebrycia	2	115			0	0	0
MZFC	Strymon	cestri	1	91			0	0	0
MZFC	Strymon	istapa	2	275			2	2	0
MZFC	Strymon	megarus	3	24	19	5	0	0	0
MZFC	Strymon	melinus	2	75			0	0	0
MZFC	Strymon	rufofusca	2	722			3	3	0
MZFC	Strymon	serapio	2	21	9	12	0	0	0
MZFC	Strymon	yojoa	3	306			1	1	0
MZFC	Strymon	ziba	3	184	76	108	1	1	0
MZFC	Symbiopsis	sp	2	38			1	1	0
MZFC	Thaeides	theia	4	15	9	6	0	0	0
MZFC	Theclopsis	mycon	2	383	316	67	9	9	0
MZFC	Thereus	cithonius	2	21	10	11	1	1	0
MZFC	Thereus	oppia	2	91	74	17	3	2	1
MZFC	Thereus	orasus	2	12			0	0	0
MZFC	Thereus	ortalus	2	28	15	13	0	0	0
MZFC	Theritas	augustinula	3	64			0	0	0
MZFC	Theritas	lisus	2	48	30	18	0	0	0
MZFC	Theritas	mavors	2	252	181	71	0	0	0
MZFC	Theritas	theocritus	3	56			0	0	0
MZFC	Tmolus	conoveria	2	12	10	2	0	0	0
MZFC	Tmolus	crolinus	3	219	181	38	0	0	0
MZFC	Tmolus	echion	3	273	141	132	1	0	1
MZFC	Ziegleria	denarius	2	121	92	29	1	1	0
MZFC	Ziegleria	guzanta	2	215			5	1	4
MZFC	Ziegleria	hesperitis	2	108			0	0	0
MZFC	Ziegleria	hoffmani	2	41			1	1	0
MZFC	Ziegleria	syllis	2	59	43	16	0	0	0
